# Supplementary material for: A novel organic–inorganic hybrid conducting copolymer for mediated biosensor applications
Source: Royal Society of Chemistry journal article supplement (doi:10.1039/c4ra07516a), 2014-01-01
Supplement: c4ra07516a1.pdf [file c4ra07516a1.pdf]

## SUPPLEMENTARY MATERIALS

### A Novel Organic-Inorganic Hybrid Conducting Copolymer for Mediated Biosensor Applications

Tugba SOGANCI, Dilek ODACI DEMIRKOL, Metin AK, Suna TIMUR

**Table S1.** Some features of glucose biosensors which prepared using immobilized Fc in the literature.

| Electrode | Immobilization matrix         | Biological material | Working potential (V) | Linear Range for glucose (mM) | Response time (s) | Km (mM) | LOD (mM) | Reference |
|-----------|-------------------------------|---------------------|-----------------------|-------------------------------|-------------------|---------|----------|-----------|
| GCE       | CHIT-Fc                       | GOx                 | 0.35 V (vs. Ag/AgCl)  | 2.0-16.0                      | 20                | -       | 0.565    | 24        |
| GCE       | CHIT-Fc                       | <i>G. oxydans</i>   | 0.35V (vs. Ag/AgCl)   | 1.5-25.0                      | 70                | -       | -        | 24        |
| Au        | AuNP/(FcSH+Cyst)/PAMAM        | GOx                 | 0.35 V (vs. Ag/AgCl)  | 1.0-5.0                       | -                 | -       | 0.6      | 23        |
| ITO       | P(Py-FcPy)                    | GOx                 | 0.175 V (vs. Ag/AgCl) | 2.8-16.8                      | 25                | 1.6     | -        | 40        |
| GCE       | Py/Py-CO <sub>2</sub> H/Py-Fc | GOx                 | 0.38 V (vs. Ag/AgCl)  | 1.0-4.0                       | 2                 | 4.73    | -        | 27        |
| Au        | MWCNTs/Chi-BSA-Fc             | GOx                 | 0.175 V (vs. Ag/AgCl) | 0.01-30.0                     | 150               | 1.5     | 0.01     | 44        |
| GE        | P(TPFc-co-TPA)                | GOx                 | 0.45 (vs. Ag/AgCl)    | 0.75-75.0                     | 12                | 20.23   | 0.03     | This work |

**GCE:** Glassy carbon electrodes; **CHIT-Fc:** Chitosan-ferrocene; **Au:** Gold electrode; **AuNP/(FcSH+Cyst)/PAMAM:** Gold nanoparticles/6-(Ferrocenyl) hexanethiol/cysteamine/polyamidoamine dendrimer; **GE:** Graphite electrode; **SNS-NH<sub>2</sub>/SNS-NH<sub>2</sub>Fc:** 4-(2,5-di (thiophen-2-yl)-1H-pyrrol-1-yl)amido ferrocenyldithiophosphonate<sub>co.4</sub> -(2,5-di (thiophen-2-yl)-1H-pyrrol-1 yl) aniline; **ITO:** Indium thin oxide; **P(Py-FcPy):** Copolymer of pyrrole and ferrocenecarboxylate modified pyrrole; **Py/Py-CO<sub>2</sub>H/Py-Fc:** Pyrrol/N-(3-(1H-pyrrol-1-yl)ethyl)ferrocenecarboxate; **MWCNTs/Chi-BSA-Fc:** Chitosan-bovine serum albumin (Chi-BSA) cryogel with incorporated multiwalled carbon nanotubes (MWCNTs), ferrocene (Fc).
